# Supplementary material
Source: PubMed Central journal article supplement (PMC5550306)

**Biophysical Journal, Volume 113**

**Supplemental Information**

**Dynamics of Tissue-Induced Alignment of Fibrous Extracellular Matrix**

**Alexandra S. Piotrowski-Daspit, Bryan A. Nerger, Abraham E. Wolf, Sankaran Sundaresan, and Celeste M. Nelson**

## Supplementary Figure Legends

**Figure S1: Epithelial and fibroblast tissues exhibit junctional  $\beta$ -catenin.** Phase-contrast images of a representative (A) EpH4 mouse mammary epithelial tissue and (B) NIH3T3 fibroblast tissue. Immunofluorescence staining for  $\beta$ -catenin (green) in a representative (C, E) EpH4 mouse mammary epithelial tissue and (D, F) NIH3T3 fibroblast tissue. Nuclei are counterstained with Hoechst 33342 (blue). Scale bars, 50  $\mu$ m.

**Figure S2: E $\Delta$ -expressing cells exhibit reduced junctional  $\beta$ -catenin.** Immunofluorescence staining for  $\beta$ -catenin (green) in EpH4 mouse mammary epithelial cells transduced with (A) AdGFP or (B) AdE $\Delta$ . Arrows indicate disrupted  $\beta$ -catenin localization at cell-cell boundaries. Nuclei are counterstained with Hoechst 33342 (blue). Scale bars, 50  $\mu$ m.

**Figure S3. E-cadherin expression in stable MDA-MB-231 cell lines.** (A) Relative transcript levels of E-cadherin in YFP or Ecad-GFP MDA-MB-231 cells. (B) Immunoblot analysis for E-cadherin in YFP or Ecad-GFP in stable MDA-MB-231 cell lines. \*  $P < 0.05$ . Figure adapted from (28).

Figure S1

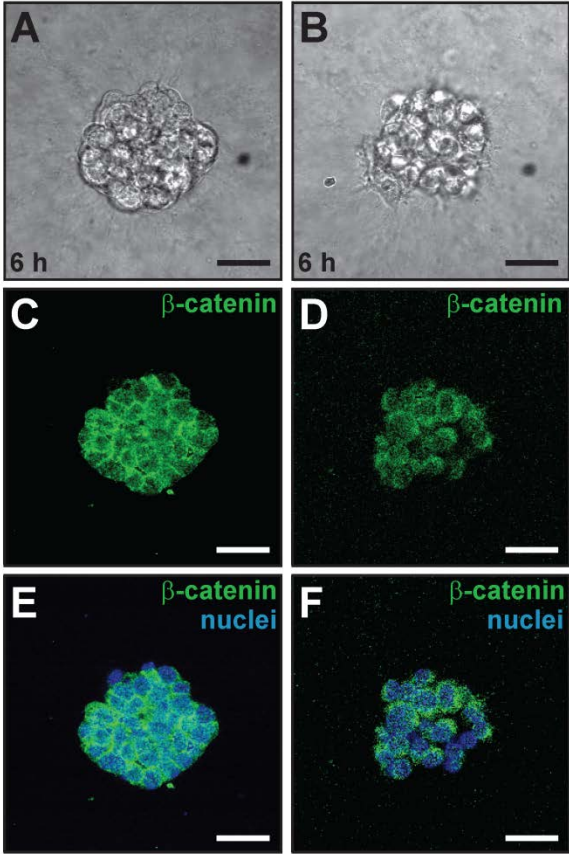

Figure S2

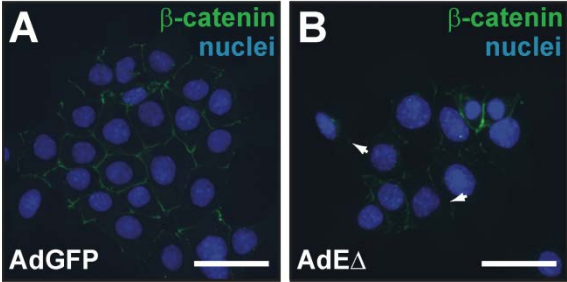

**Figure S3**

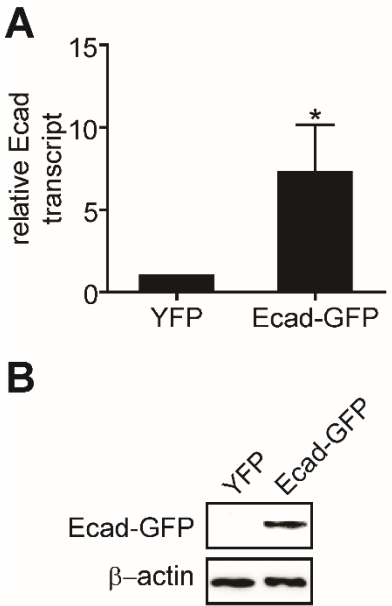

Supplement: mmc1.pdf [file mmc1.pdf]
